# Supplementary material for: Expression profiles and prognostic significance of WNT family members in glioma via bioinformatic analysis
Source: PubMed Central journal article supplement (PMC7103590; doi:10.1042/bsr20194255), 2020-03-27
Supplement: BSR-2019-4255_supp.pdf [file BSR-2019-4255_supp.pdf]

**A**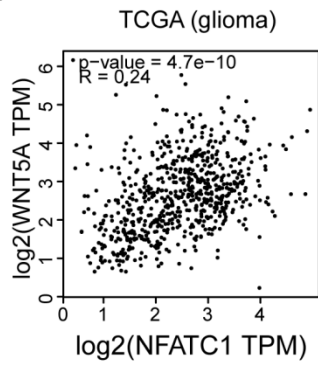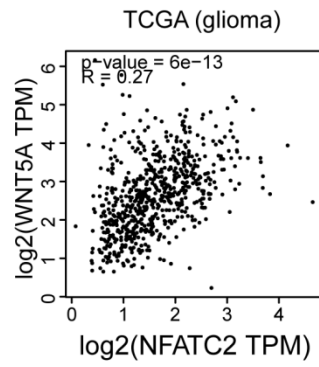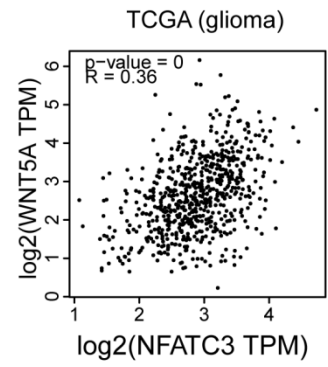**B**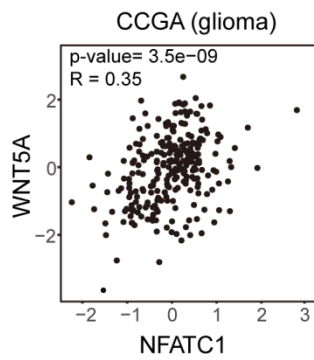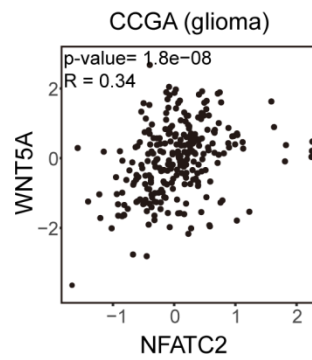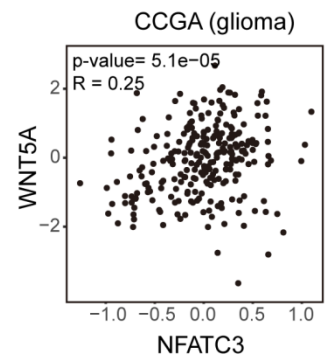

**Supplementary figure 1:** (A) Positive correlation between the expression levels of WNT5A and NFAT subtypes analyzed with TCGA data. (B) Positive correlation between the expression levels of WNT5A and NFAT subtypes analyzed with CCGA data.
